# Supplementary material for: Load-Oriented Nonplanar Additive Manufacturing Method for Optimized Continuous Carbon Fiber Parts
Source: MDPI journal article supplement (doi:10.3390/ma16030998), 2023-01-21
Supplement: s1 [file s1]

# Supplementary Material for Load-Oriented Nonplanar Additive Manufacturing Method for Optimized Continuous Carbon Fiber Parts

## 1 Pictures of Verification of Viability

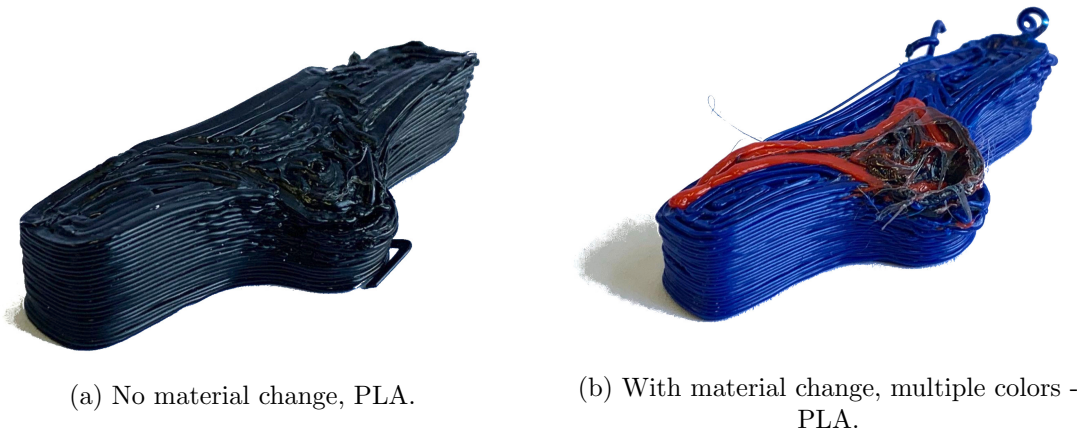

Figure S1: Results of the first test series. After first layers of the part geometry, visible in (b) in red the process was terminates due to defects.

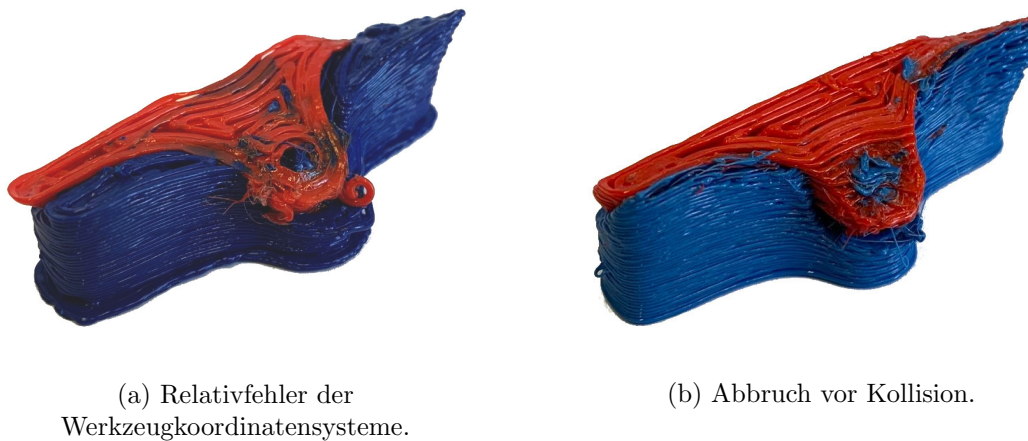

Figure S2: Results of the second test series. Relative error in coordinate frames and collision due to part orientation.

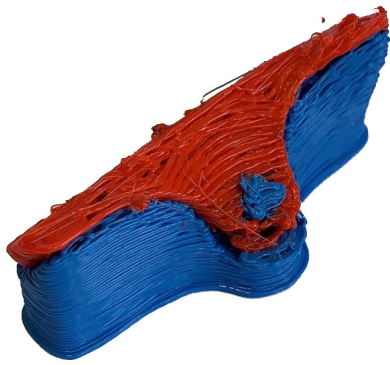

(a) Fertigungsergebnis aus PLA.

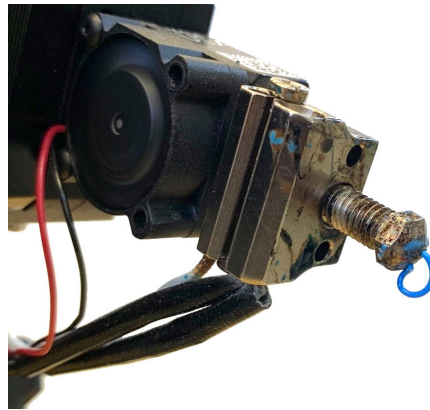

(b) Düse mit Materialüberschuss.

Figure S3: Results of the third test series. Problems due to oozing, stringing and material extrusion.

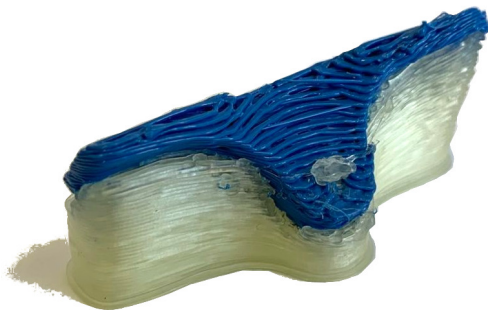

(a) Gedrucktes Bauteil aus PLA mit Stützstruktur aus PVA.

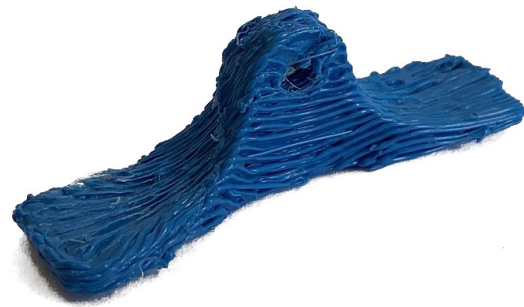

(b) Gedrucktes Bauteil, Versuchsergebnis.

Figure S4: Results of the fourth test series. Manufacturing process could be completed and the support material was successfully dissolved.

## 2 Pseudocode

### 2.1 Region Flooding

Used notation: sets  $I$  for current indices,  $R$  for elements in the current region,  $F$  for the elements for which calculation is finished and  $C$  for the candidates.

---

**Algorithm S1** Region Flooding

---

**Require:**  $\alpha \in [0, 1]$ ,  $n_{region} \in \mathbb{N}^+$

```
 $l \leftarrow 1$ 
 $I \leftarrow \{ \text{pop}(\mathcal{T}^*) \}$ 
 $R \leftarrow \emptyset$ 
 $F \leftarrow \mathcal{T} \setminus \mathcal{T}^*$ 
while  $F \neq \mathcal{T}$  do
  if  $I \neq \emptyset$  then
     $i \leftarrow \text{pop}(I)$ 
  else if  $|R| > n_{region}$  then
     $\text{reorder}(R)$ 
     $\mathcal{T}_l^* \leftarrow R$ 
     $l \leftarrow l + 1$ 
     $F \leftarrow F \cup R$ 
     $I \leftarrow \{ \text{pop}(\mathcal{T}^* \setminus F) \}$ 
     $R \leftarrow \emptyset$ 
  end if
   $N \leftarrow \text{neighbors}(i) \cap \text{neighbors}(\text{neighbors}(i))$ 
   $C \leftarrow (\mathcal{T}^* \cap N) \setminus (I \cup R \cup F)$ 
  for  $c \in C$  do
    if  $|e_{min}(i) \cdot e_{min}(c)| > \alpha$  then
      if  $e_{min}(i) \cdot e_{min}(c) < 0$  then
         $\text{flip\_direction}(c)$ 
      end if
       $I \leftarrow I \cup \{c\}$ 
    end if
  end for
   $R \leftarrow R \cup \{i\}$ 
end while
```

---

## 2.2 Orientation and Extrapolation

---

**Algorithm S2** Orientation and extrapolation

---

**Require:**  $\{T_l^*\}_{1,\dots,n_{regions}}, V$

$n_{iter} \leftarrow 2^{n_{regions}}$

$E_{min} \leftarrow \infty$

$i_{min} \leftarrow 0$

**for**  $i \in 1, \dots, n_{iter}$  **do**

$o \leftarrow \text{binary}(i)$

$\triangleright$  Tupelindex from binary representation

$V(T_o^*) \leftarrow -V(T_o^*)$

$\triangleright$  direction change at tupelindex o

$V \leftarrow \text{extrapolate}(V)$

$E_W \leftarrow \text{compute\_energy}(V, T_l^*)$

**if**  $E_W < E_{min}$  **then**

$E_{min} \leftarrow E_W$

$i_{min} \leftarrow i$

**end if**

$V(T_o^*) \leftarrow -V(T_o^*)$

$\triangleright$  Change back

**end for**

$o \leftarrow \text{binary}(i_{min})$

$V(T_o^*) \leftarrow -V(T_o^*)$

$V \leftarrow \text{extrapolate}(V)$

---

## 2.3 Rerouting

Used notation: Minimal spanning tree of contours  $T$ ; dictionary of isocontours `line_dict`; number of points  $n_w$ , that correspond to the path width  $w_p$  after resampling; rerouting distance  $w_r$ ; path width  $w_p$ ; current contour  $c_{curr}$ ; starting index  $i_{start}$ ; binary list of already connected contours `rerouted`; current path `path`. From the outer function the call to `recreroute()` with the root contour, the starting index 0 and a list of zeros as `rerouted`. The root contour is always set as the outer contour, not an hole contour.

---

### Algorithm S3 Recursive rerouting

---

```

statics  $\leftarrow (T, \text{line\_dict}, n_w, w_r, w_p)$ 
function RECREROUTE(statics, ccurr, istart, rerouted, path)
    C  $\leftarrow \text{childs}(c_{curr})$ 
     $\{c_k\}_{k \in C} \leftarrow \text{line\_dict}[C]$ 
     $n_c \leftarrow |\{c_k\}_{k \in C}|$ 
    if (ccurr is leaf) oder ( $\forall k \in C : \text{rerouted}[k]$  is True) then
        return (rerouted, path)
    end if
    while Not all  $c_k$  in rerouted do
         $P_p \leftarrow \{i:[] \text{ for } i \in 1, \dots, n_c\}$ 
         $P_c \leftarrow \{i:[] \text{ for } i \in 1, \dots, n_c\}$ 
        for  $i_f \in 1, \dots, \text{len}(\text{path})$  do
             $i \leftarrow (i_f + i_{start}) \% \text{len}(\text{path})$   $\triangleright \%$  is the modulo operator
             $p_{closest}, c_{matching} \leftarrow \text{find\_closest\_point}(\text{path}[k])$ 
            if  $\text{dist}(p_{closest}, \text{path}[i]) < w_r$  then
                 $P_p[\text{index}(c_{matching})].\text{append}(\text{path}[i])$ 
                 $P_c[\text{index}(c_{matching})].\text{append}(p_{closest})$ 
                 $I_p, -, -, - \leftarrow \text{get\_segment\_inds}(P_p, P_c, \text{path}, c_k, n_w)$ 
                if Segment  $\text{path}[I_p]$  is longer than  $w_p$  then
                     $s_p, s_c, m_p, m_c, \gamma \leftarrow \text{get\_rerouting\_segments}(P_p, P_c, \text{path}, c_k, n_w)$ 
                     $i_{start}, \text{path} \leftarrow \text{reroute}(s_p, s_c, m_p, m_c, \gamma)$ 
                    break
                end if
            else
                 $P_p[\text{index}(c_{matching})] = []$ 
                 $P_c[\text{index}(c_{matching})] = []$ 
            end if
        end for
         $\text{rerouted}, \text{path} \leftarrow \text{recreroute}(\text{statics}, \text{index}(c_{matching}), i_{start}, \text{rerouted}, \text{path})$ 
         $\text{rerouted}[\text{index}(c_{matching})] \leftarrow \text{True}$ 
    end while
end function

```

---

Used notation: `get_rerouting_segments` gets the point candidates  $P_r$  and  $P_c$  for the path and the child contour, the path `path`, the current contour  $c_k$ , the path width  $w_p$  and the number of points  $n_w$ , that correspond to the path width  $w_p$  after resampling.

---

**Algorithm S4** Computation of the connecting segments

---

```

function GET_REROUTING_SEGMENTS( $P_p, P_c, path, c_k, w_d, n_w$ )
   $I_p, I_c, m_p, m_c \leftarrow \text{get\_segment\_inds}(P_p, P_c, path, c_k, n_w)$ 
   $s_p \leftarrow path[I_p]; s_c \leftarrow c_k[I_c]$ 
   $V_p \leftarrow s_p[1:] - s_p[: -1]; V_c \leftarrow s_c[1:] - s_c[: -1]$ 
   $dir_p \leftarrow \text{mean}(V_p); dir_c \leftarrow \text{mean}(V_c)$ 
   $\gamma \leftarrow \langle dir_p, dir_c \rangle$ 
  while Segment  $s_c$  is shorter than  $w_p$  do
    if No kink in  $s_c$  then Add previous neighbor from  $c_k$  to  $s_c$ 
    end if
    if No kink in  $s_c$  then Add previous neighbor from  $c_k$  to  $s_c$ 
    else break
    end if
  end while
  return  $s_p, s_c, m_p, m_c, \gamma$ 
end function

function GET_SEGMENT_INDS( $P_p, P_c, path, c_k, n_w$ )
   $n_{thresh} \leftarrow \frac{n_w}{2}$ 
   $m_p \leftarrow (\exists n \in path : n < n_{thresh}) \wedge (\exists n \in path : n > \text{len}(path) - 1 - n_{thresh})$ 
   $m_c \leftarrow (\exists n \in c_k : n < n_{thresh}) \wedge (\exists n \in path : n > \text{len}(c_k) - 1 - n_{thresh})$ 
  if  $\neg m_p \wedge \neg m_c$  then  $I_p \leftarrow \text{sort}(P_p); I_c \leftarrow \text{sort}(P_c)$ 
  else if  $m_p \wedge \neg m_c$  then  $I_p \leftarrow \text{modulo\_sort}(P_p); I_c \leftarrow \text{sort}(P_c)$ 
  else if  $\neg m_p \wedge m_c$  then  $I_p \leftarrow \text{sort}(P_p); I_c \leftarrow \text{modulo\_sort}(P_c)$ 
  else if  $m_p \wedge m_c$  then  $I_p \leftarrow \text{modulo\_sort}(P_p); I_c \leftarrow \text{modulo\_sort}(P_c)$ 
  end if
  return  $(I_p, I_c, m_p, m_c)$ 
end function

function MODULO_SORT( $P$ )
   $I_u \leftarrow \text{sort}(P)$ 
   $i_s \leftarrow \text{len}(P_p) - 1 - \text{argmin}(P_p)$ 
   $i_e \leftarrow \text{len}(P_p) - 1 - \text{argmax}(P_p)$ 
   $s \leftarrow I_u[i_e:] \circ I_u[: i_s + 1]$ 
  return  $s$ 
end function

```

---

---

**Algorithm S5** Connection of the path to one isocontour

---

```
function REROUTE( $path, c_k, s_p, s_c, m_p, m_c, \gamma$ )  
   $i_p^{in} \leftarrow s_p[0]$   
   $i_p^{out} \leftarrow s_p[-1]$   
  if  $\gamma < 0$  then  
     $i_c^{in} \leftarrow s_c[-1]$   
     $i_c^{out} \leftarrow s_c[0]$   
  else  
     $i_c^{in} \leftarrow len(c_k) - 1 - s_c[0]$   
     $i_c^{out} \leftarrow len(c_k) - 1 - s_c[-1]$   
     $c_k \leftarrow reverse(c_k)$   
  end if  
  if  $\neg m_p \wedge \neg m_c$  then  
     $path \leftarrow path[: i_p^{in} + 1] \circ c_k[i_c^{in} :] \circ c_k[: i_c^{out} + 1] \circ path[i_p^{out} :]$   
  else if  $m_p \wedge m_c$  then  
     $path \leftarrow path[i_p^{in}] \circ c_k[i_c^{in} : i_c^{out} + 1] \circ path[i_p^{out} : i_p^{in} + 1]$   
  else if  $\neg m_p \wedge m_c$  then  
     $path \leftarrow path[: i_p^{in} + 1] \circ c_k[i_c^{in} : i_c^{out} + 1] \circ path[i_p^{out} :]$   
  else if  $m_p \wedge \neg m_c$  then  
     $path \leftarrow path[i_p^{in}] \circ c_k[i_c^{in} :] \circ c_k[: i_c^{out} + 1] \circ path[i_p^{out} : i_p^{in} + 1]$   
  end if  
end function
```

---
